# Supplementary material for: The role of copper(ii) in the aggregation of human amylin
Source: Royal Society of Chemistry journal article supplement (doi:10.1039/c4mt00130c), 2014-01-01
Supplement: c4mt00130c1.pdf [file c4mt00130c1.pdf]

## Supplementary Material

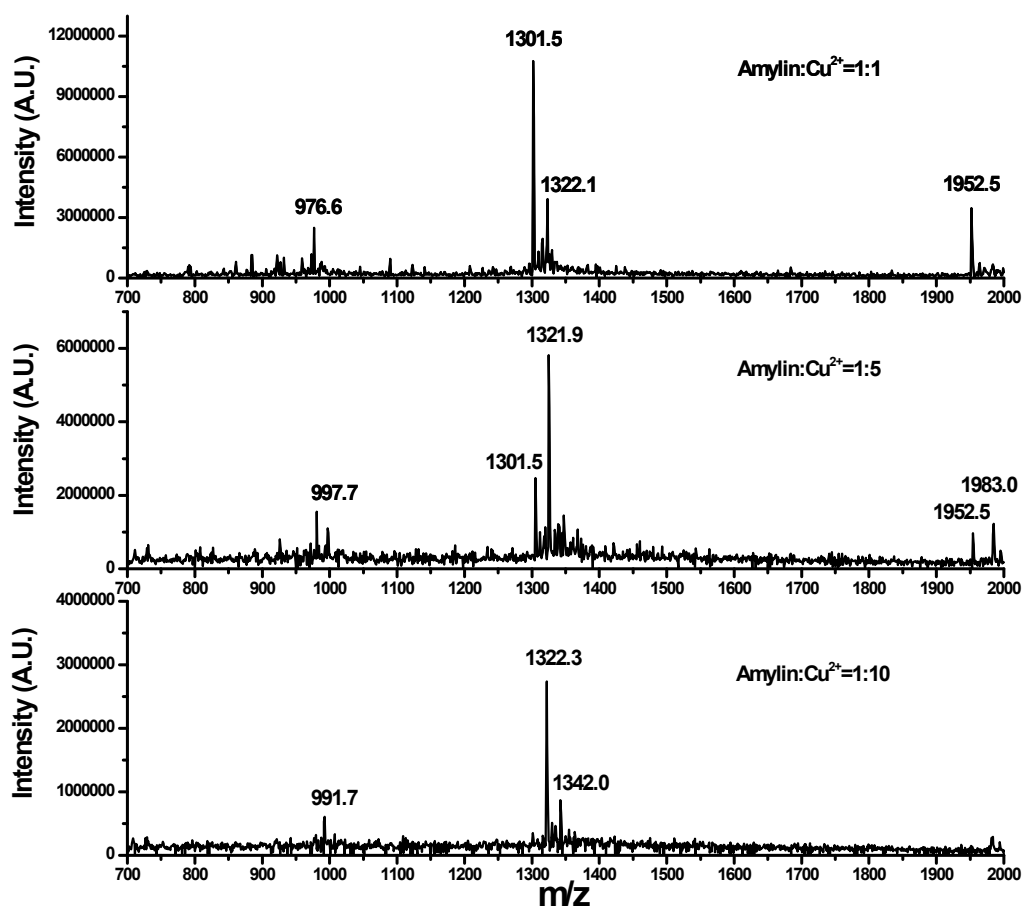

**Figure 1S:** Mass spectra of h-amylin:Cu<sup>2+</sup> solutions at the indicated ratios. pH =7.4, NH<sub>4</sub>CH<sub>3</sub>COO = 10mM. The absolute intensity decreases with increasing CuSO<sub>4</sub> concentration because of the effect of salt concentration on the ionization process. Note the absence of amylin-copper species different from the 1:1 complex even at high copper concentrations.

**Table 1S: Assignment of the peaks detected in the positive ESI mass spectra of h-Amylin 1-37 with and without CuSO<sub>4</sub>**

**h-Amylin 1-37 pH=7.4 (10 mM of NH<sub>4</sub>CH<sub>3</sub>COO)**

| <i>Structure</i>                              | <i>m/z observed</i> | <i>M/z calculated</i> |
|-----------------------------------------------|---------------------|-----------------------|
| <i>[h-Am 1-37] H<sub>2</sub><sup>2+</sup></i> | 1952.7              | 1952.4                |
| <i>[h-Am 1-37] H<sub>3</sub><sup>3+</sup></i> | 1302.4              | 1301.9                |
| <i>[h-Am 1-37] H<sub>4</sub><sup>4+</sup></i> | 976.9               | 976.7                 |

**h-Amylin 1-37 pH=7.4 (10 mM of NH<sub>4</sub>CH<sub>3</sub>COO) + Cu (II) (molar ratio 1:1)**

| <i>Structure</i>                                                                   | <i>M/z observed</i> | <i>M/z calculated</i> |
|------------------------------------------------------------------------------------|---------------------|-----------------------|
| <i>[h-Am 1-37] H<sub>2</sub><sup>2+</sup></i>                                      | 1952.5              | 1952.4                |
| <i>[h-Am 1-37 + Cu - 2H] H<sub>2</sub><sup>2+</sup></i>                            | 1983.0              | 1982.9                |
| <i>[h-Am 1-37 + Cu - 2H] Na<sub>2</sub><sup>2+</sup></i>                           | 1994.4              | 1993.9                |
|                                                                                    |                     |                       |
| <i>[h-Am 1-37] H<sub>3</sub><sup>3+</sup></i>                                      | 1301.5              | 1301.9                |
| <i>[h-Am 1-37 + Cu - 2H] H<sub>3</sub><sup>3+</sup></i>                            | 1322.1              | 1322.2                |
| <i>[h-Am 1-37 + Cu - 2H] H<sub>2</sub><sup>2+</sup>Na<sup>+</sup></i>              | 1329.9              | 1329.6                |
| <i>[h-Am 1-37 + Cu - 2H] H<sub>2</sub><sup>2+</sup>K<sup>+</sup></i>               | 1335.4              | 1334.9                |
| <i>[h-Am 1-37 + Cu - 2H] H<sup>+</sup>Na<sub>2</sub><sup>2+</sup></i>              | 1336.6              | 1336.9                |
| <i>[h-Am 1-37 + Cu - 2H] H<sup>+</sup>Na<sup>+</sup>K<sup>+</sup></i>              | 1341.5              | 1342.2                |
| <i>[h-Am 1-37 + Cu - 2H] H<sup>+</sup>K<sub>2</sub><sup>2+</sup></i>               | 1348.0              | 1347.6                |
| <i>[h-Am 1-37 + Cu - 2H] H<sup>+</sup>Na<sub>2</sub><sup>2+</sup></i>              | 1357.0              | 1357.6                |
|                                                                                    |                     |                       |
| <i>[h-Am 1-37] H<sub>4</sub><sup>4+</sup></i>                                      | 976.6               | 976.7                 |
| <i>[h-Am 1-37] H<sub>3</sub><sup>3+</sup>Na<sup>+</sup></i>                        | 982.2               | 982.2                 |
| <i>[h-Am 1-37] H<sub>3</sub><sup>3+</sup>K<sup>+</sup></i>                         | 986.2               | 986.2                 |
| <i>[h-Am 1-37] H<sub>2</sub><sup>2+</sup>Na<sub>2</sub><sup>2+</sup></i>           | 988.2               | 987.7                 |
| <i>[h-Am 1-37 + Cu - 2H] H<sub>4</sub><sup>4+</sup></i>                            | 991.8               | 992.0                 |
| <i>[h-Am 1-37 + Cu - 2H] H<sub>3</sub><sup>3+</sup>Na<sup>+</sup></i>              | 997.8               | 997.5                 |
| <i>[h-Am 1-37 + Cu - 2H] H<sub>3</sub><sup>3+</sup>K<sup>+</sup></i>               | 1001.5              | 1001.4                |
| <i>[h-Am 1-37 + Cu - 2H] H<sub>2</sub><sup>2+</sup>Na<sub>2</sub><sup>2+</sup></i> | 1002.7              | 1002.9                |
| <i>[h-Am 1-37 + Cu - 2H] H<sub>2</sub><sup>2+</sup>K<sub>2</sub><sup>2+</sup></i>  | 1011.6              | 1011.0                |

**h-Amylin 1-37 pH=7.4 (10 mM of NH<sub>4</sub>CH<sub>3</sub>COO) + Cu (II) (molar ratio 1:5)**

| <i>Structure</i>                                                                    | <i>M/z observed</i> | <i>M/z calculated</i> |
|-------------------------------------------------------------------------------------|---------------------|-----------------------|
| <i>[h-Am 1-37] H<sub>2</sub><sup>2+</sup></i>                                       | 1952.5              | 1952.4                |
| <i>[h-Am 1-37 + Cu - 2H] H<sub>2</sub><sup>2+</sup></i>                             | 1983.0              | 1982.9                |
| <i>[h-Am 1-37 + Cu - 2H] Na<sub>2</sub><sup>2+</sup></i>                            | 1994.5              | 1993.9                |
|                                                                                     |                     |                       |
| <i>[h-Am 1-37] H<sub>3</sub><sup>3+</sup></i>                                       | 1301.5              | 1301.9                |
| <i>[h-Am 1-37 + Cu - 2H] H<sub>3</sub><sup>3+</sup></i>                             | 1321.9              | 1322.2                |
| <i>[h-Am 1-37 + Cu - 2H] H<sub>2</sub><sup>2+</sup>Na<sup>+</sup></i>               | 1329.2              | 1329.6                |
| <i>[h-Am 1-37 + Cu - 2H] H<sub>2</sub><sup>2+</sup>K<sup>+</sup></i>                | 1334.4              | 1344.9                |
| <i>[h-Am 1-37 + Cu - 2H] H<sup>+</sup>Na<sub>2</sub><sup>2+</sup></i>               | 1336.6              | 1336.9                |
| <i>[h-Am 1-37 + Cu - 2H] H<sup>+</sup>Na<sup>+</sup>K<sup>+</sup></i>               | 1341.5              | 1342.2                |
| <i>[h-Am 1-37 + 2Cu - 4H] H<sub>3</sub><sup>3+</sup></i>                            | 1342.2              | 1342.6                |
| <i>[h-Am 1-37 + 2Cu - 4H] H<sub>2</sub><sup>2+</sup>Na<sup>+</sup></i>              | 1350.1              | 1350.0                |
| <i>[h-Am 1-37 + 2Cu - 4H] H<sub>2</sub><sup>2+</sup>K<sup>+</sup></i>               | 1355.5              | 1355.3                |
| <i>[h-Am 1-37 + Cu - 2H] H<sup>+</sup>Na<sub>2</sub><sup>2+</sup></i>               | 1357.2              | 1357.6                |
|                                                                                     |                     |                       |
| <i>[h-Am 1-37 + Cu - 2H] H<sub>4</sub><sup>4+</sup></i>                             | 991.7               | 992.0                 |
| <i>[h-Am 1-37 + Cu - 2H] H<sub>3</sub><sup>3+</sup>Na<sup>+</sup></i>               | 997.7               | 997.5                 |
| <i>[h-Am 1-37 + Cu - 2H] H<sub>3</sub><sup>3+</sup>K<sup>+</sup></i>                | 1001.5              | 1001.4                |
| <i>[h-Am 1-37 + Cu - 2H] H<sub>2</sub><sup>2+</sup>Na<sub>2</sub><sup>2+</sup></i>  | 1002.9              | 1002.9                |
| <i>[h-Am 1-37 + 2Cu - 4H] H<sub>4</sub><sup>4+</sup></i>                            | 1007.3              | 1007.2                |
| <i>[h-Am 1-37 + Cu - 2H] H<sub>2</sub><sup>2+</sup>K<sub>2</sub><sup>2+</sup></i>   | 1011.3              | 1011.0                |
| <i>[h-Am 1-37 + 2Cu - 4H] H<sub>3</sub><sup>3+</sup>K<sup>+</sup></i>               | 1017.1              | 1016.7                |
| <i>[h-Am 1-37 + 2Cu - 4H] H<sub>2</sub><sup>2+</sup>Na<sub>2</sub><sup>2+</sup></i> | 1018.2              | 1018.2                |
| <i>[h-Am 1-37 + 2Cu - 4H] H<sub>2</sub><sup>2+</sup>K<sub>2</sub><sup>2+</sup></i>  | 1026.4              | 1026.2                |

**h-Amylin 1-37 pH=7.4 (10 mM of NH<sub>4</sub>CH<sub>3</sub>COO) + Cu (II) (molar ratio 1:10)**

| <i>Structure</i>                                                                    | <i>M/z observed</i> | <i>M/z calculated</i> |
|-------------------------------------------------------------------------------------|---------------------|-----------------------|
| <i>[h-Am 1-37 + Cu - 2H] H<sub>2</sub><sup>2+</sup></i>                             | 1982.6              | 1982.9                |
| <i>[h-Am 1-37 + Cu - 2H] Na<sub>2</sub><sup>2+</sup></i>                            | 1993.6              | 1993.9                |
|                                                                                     |                     |                       |
| <i>[h-Am 1-37 + Cu - 2H] H<sub>3</sub><sup>3+</sup></i>                             | 1322.3              | 1322.2                |
| <i>[h-Am 1-37 + Cu - 2H] H<sub>2</sub><sup>2+</sup>Na<sup>+</sup></i>               | 1329.7              | 1329.6                |
| <i>[h-Am 1-37 + Cu - 2H] H<sub>2</sub><sup>2+</sup>K<sup>+</sup></i>                | 1334.6              | 1334.9                |
| <i>[h-Am 1-37 + Cu - 2H] H<sup>+</sup>Na<sub>2</sub><sup>2+</sup></i>               | 1336.2              | 1336.9                |
| <i>[h-Am 1-37 + Cu - 2H] H<sup>+</sup>Na<sup>+</sup>K<sup>+</sup></i>               | 1342.0              | 1342.2                |
| <i>[h-Am 1-37 + 2Cu - 4H] H<sub>3</sub><sup>3+</sup></i>                            | 1343.0              | 1342.6                |
| <i>[h-Am 1-37 + 2Cu - 4H] H<sub>2</sub><sup>2+</sup>Na<sup>+</sup></i>              | 1355.2              | 1355.3                |
| <i>[h-Am 1-37 + 2Cu - 4H] H<sub>2</sub><sup>2+</sup>K<sup>+</sup></i>               | 1363.1              | 1363.3                |
| <i>[h-Am 1-37 + Cu - 2H] H<sup>+</sup>Na<sub>2</sub><sup>2+</sup></i>               | 1370.6              | 1370.3                |
| <i>[h-Am 1-37 + Cu - 2H] H<sub>3</sub><sup>3+</sup></i>                             | 1383.7              | 1383.3                |
|                                                                                     |                     |                       |
| <i>[h-Am 1-37 + Cu - 2H] H<sub>4</sub><sup>4+</sup></i>                             | 991.7               | 992.0                 |
| <i>[h-Am 1-37 + Cu - 2H] H<sub>3</sub><sup>3+</sup>Na<sup>+</sup></i>               | 997.9               | 997.5                 |
| <i>[h-Am 1-37 + Cu - 2H] H<sub>3</sub><sup>3+</sup>K<sup>+</sup></i>                | 1001.6              | 1001.4                |
| <i>[h-Am 1-37 + Cu - 2H] H<sub>2</sub><sup>2+</sup>Na<sub>2</sub><sup>2+</sup></i>  | 1003.2              | 1002.9                |
| <i>[h-Am 1-37 + 2Cu - 4H] H<sub>4</sub><sup>4+</sup></i>                            | 1010.8              | 1011.0                |
| <i>[h-Am 1-37 + 2Cu - 4H] H<sub>2</sub><sup>2+</sup>Na<sub>2</sub><sup>2+</sup></i> | 1018.2              | 1018.2                |
| <i>[h-Am 1-37 + 2Cu - 4H] H<sub>2</sub><sup>2+</sup>K<sub>2</sub><sup>2+</sup></i>  | 1026.4              | 1026.2                |

**Fig. 2Sa**

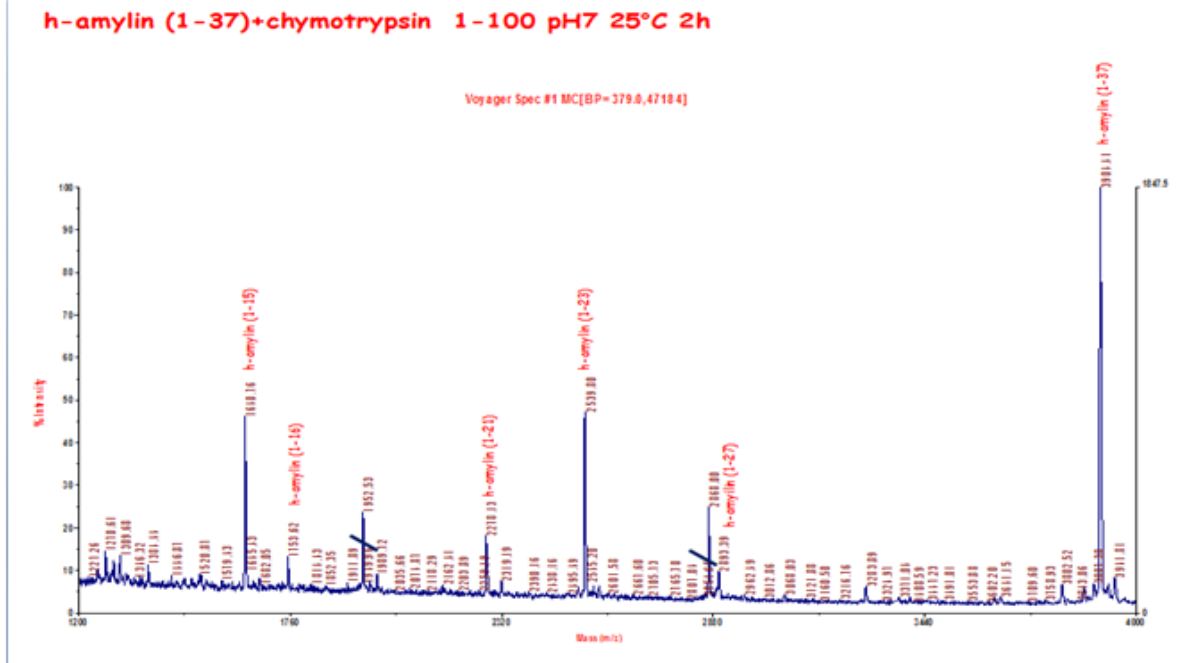

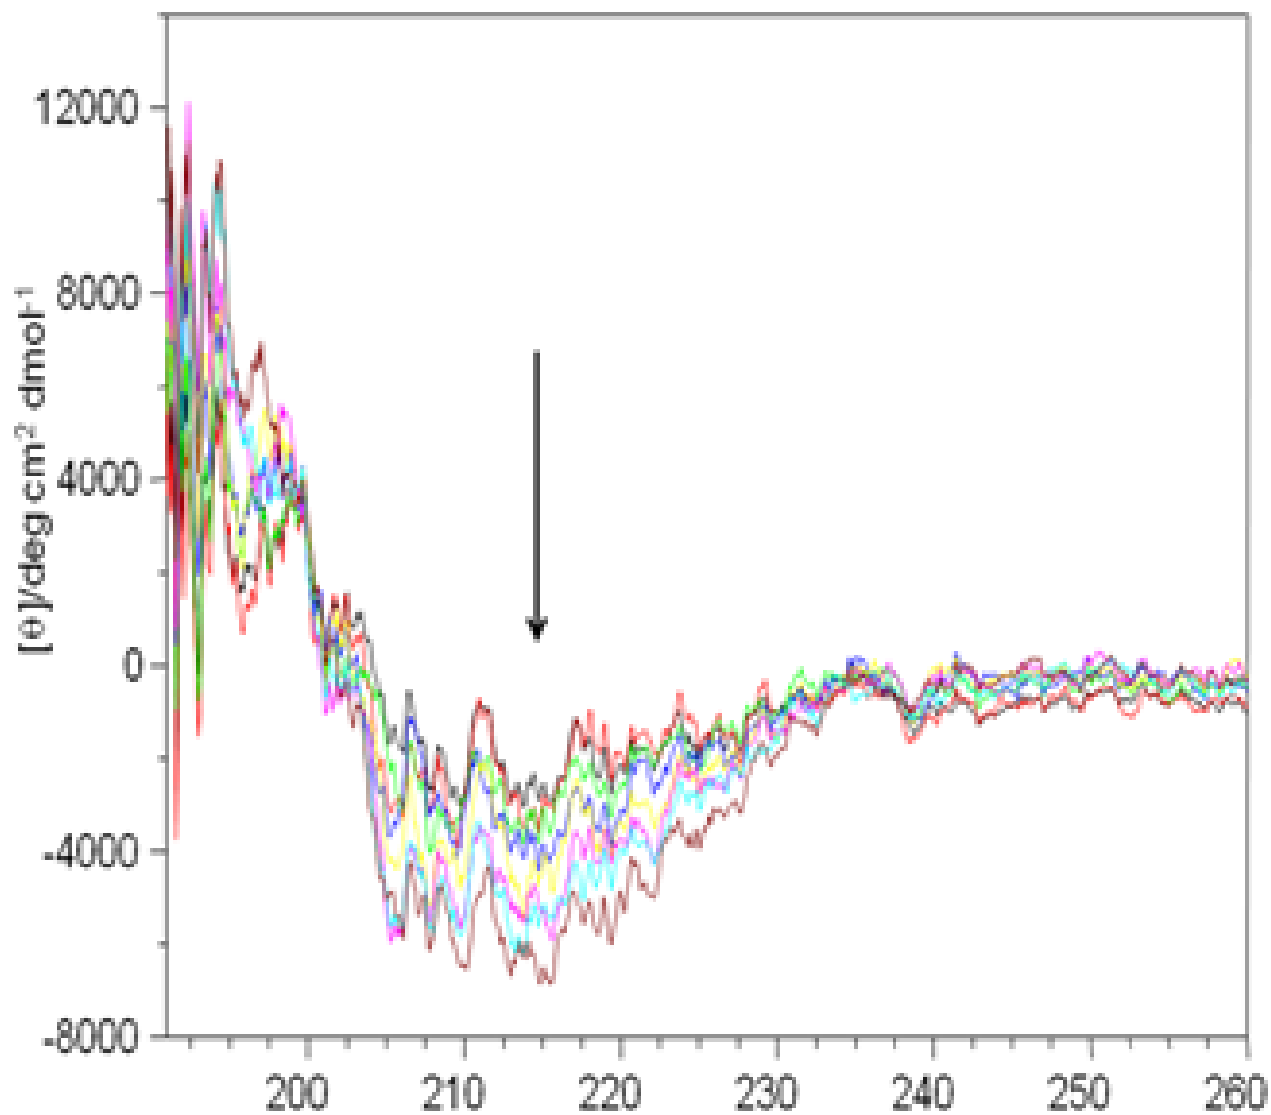

**Figure 3Sa:** Time dependent difference spectra of h-amylin 1-37 obtained by subtracting the CD spectrum of the Apo h-amylin 1-37 from the one in the presence of one molar equivalent of Cu(II). From top to bottom (arrow)  $t=0\text{ h}$ ,  $t=21\text{h}$ .

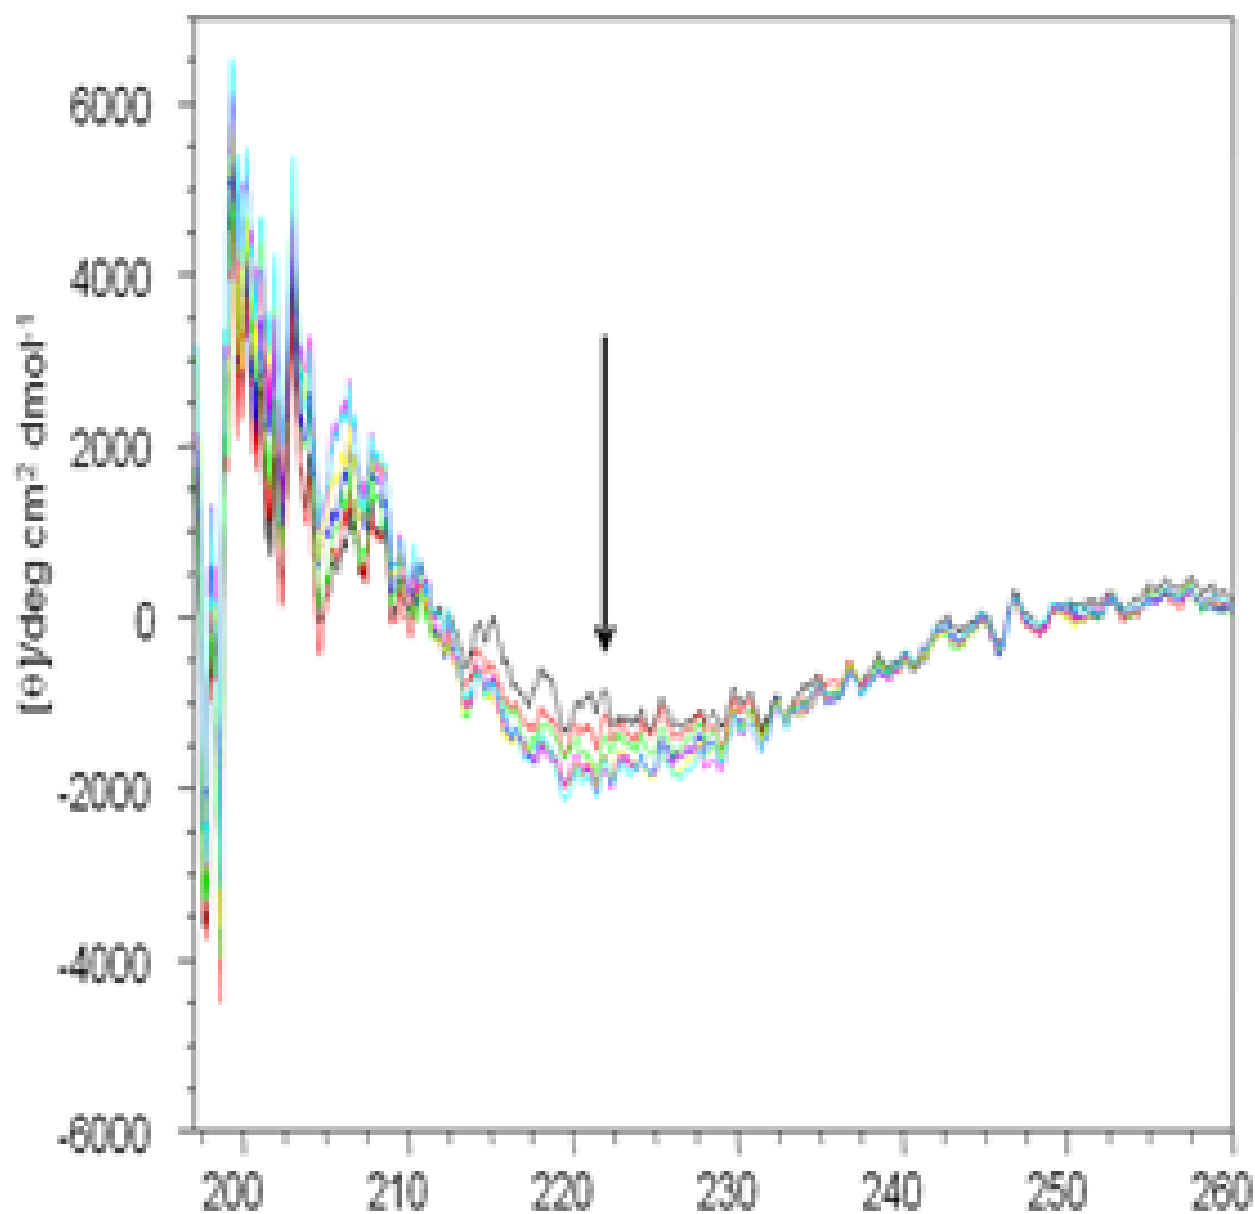

**Figure 3Sb:** Time dependent difference spectra of h-amylin 17-29 obtained by subtracting the CD spectrum of the Apo h-amylin 17-29 from the one in the presence of one molar equivalent of Cu(II). From top to bottom (arrow)  $t=0$  h,  $t=21$ h.
